# Supplementary material for: Time to intra-arrest therapeutic hypothermia in out-of-hospital cardiac arrest patients and its association with neurologic outcome: a propensity matched sub-analysis of the PRINCESS trial
Source: Springer Nature journal article supplement (doi:10.1007/s00134-020-06024-3), 2020-06-08
Supplement: MOESM1 [file 18060968]

Figure S1. Kaplan Meier curves of survival with CPC 1-2 including all rhythms

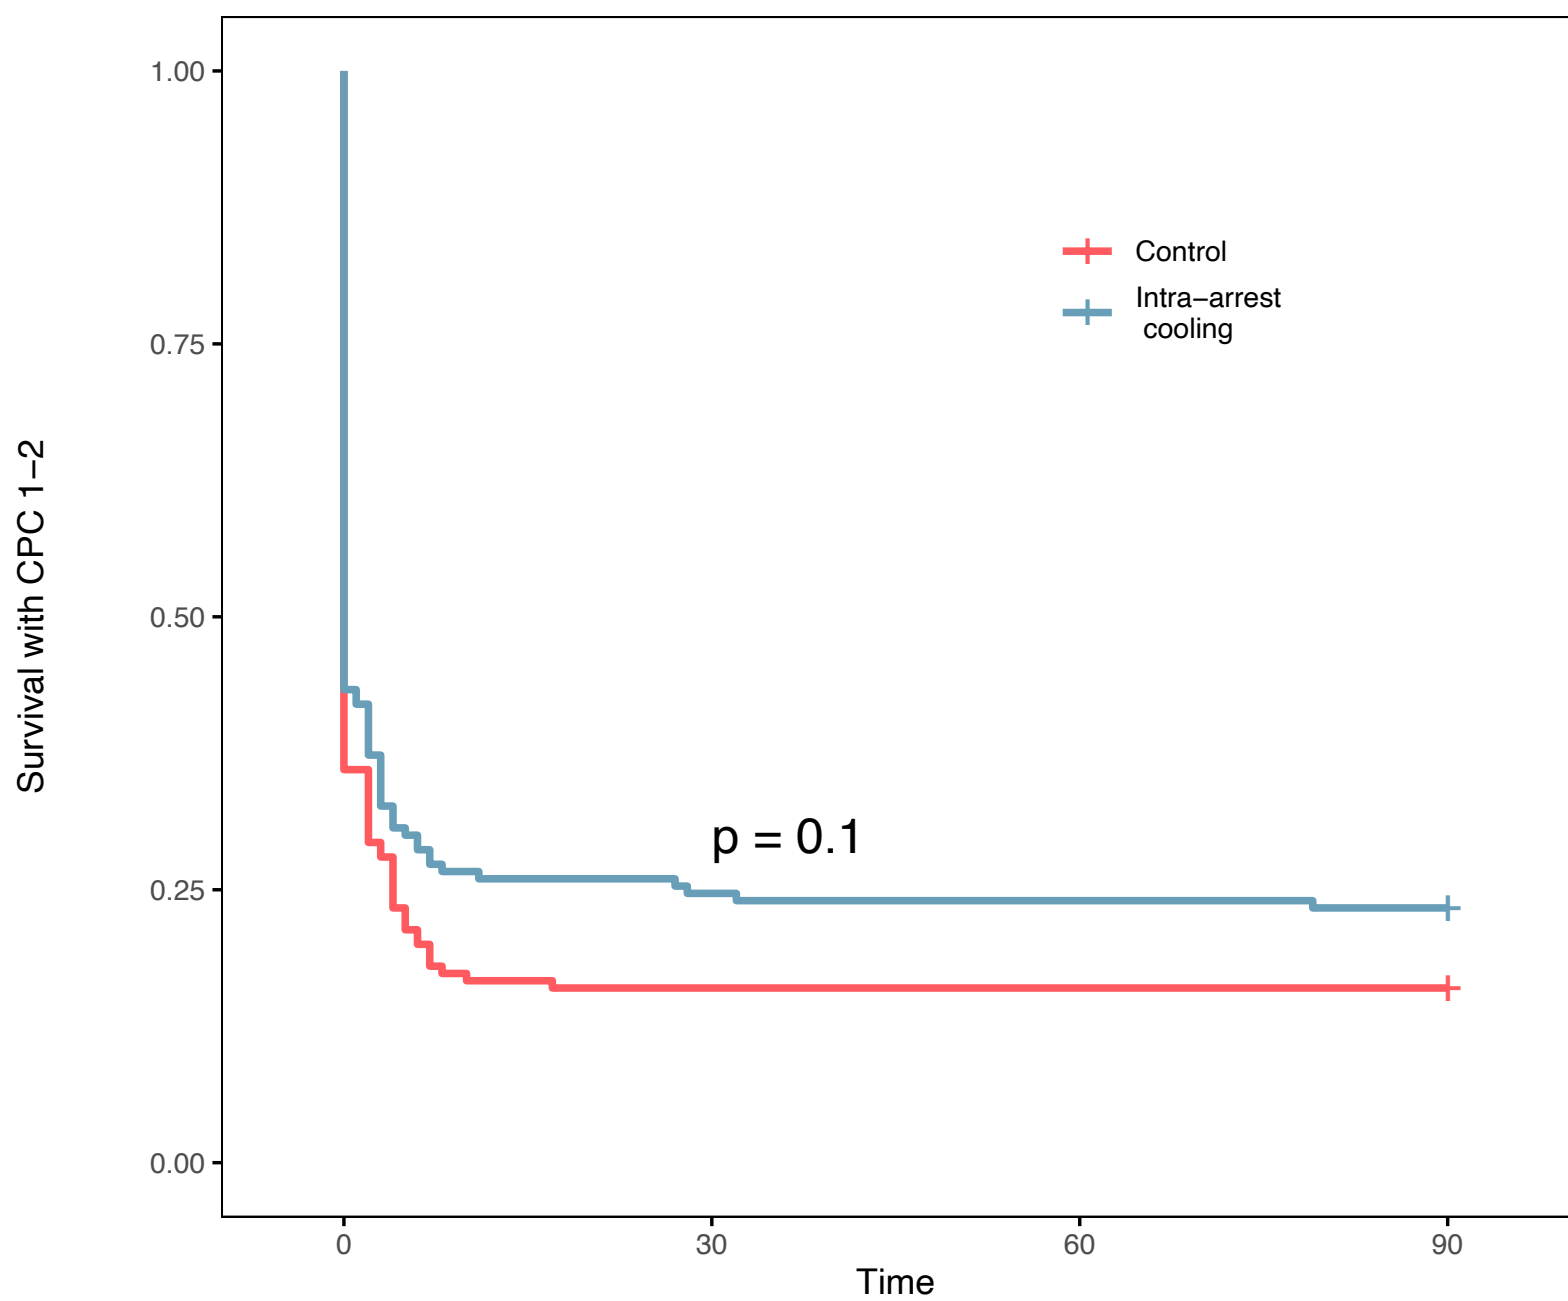

|                      |     |    |    |    |
|----------------------|-----|----|----|----|
| Control              | 150 | 24 | 24 | 24 |
| Intra-arrest cooling | 150 | 37 | 36 | 35 |

Time
