# Supplementary material for: Time to intra-arrest therapeutic hypothermia in out-of-hospital cardiac arrest patients and its association with neurologic outcome: a propensity matched sub-analysis of the PRINCESS trial
Source: Springer Nature journal article supplement (doi:10.1007/s00134-020-06024-3), 2020-06-08
Supplement: MOESM2 [file 18060968]

Figure S1. Kaplan Meier curves of survival with CPC 1-2 including patients with initial shockable rhythms

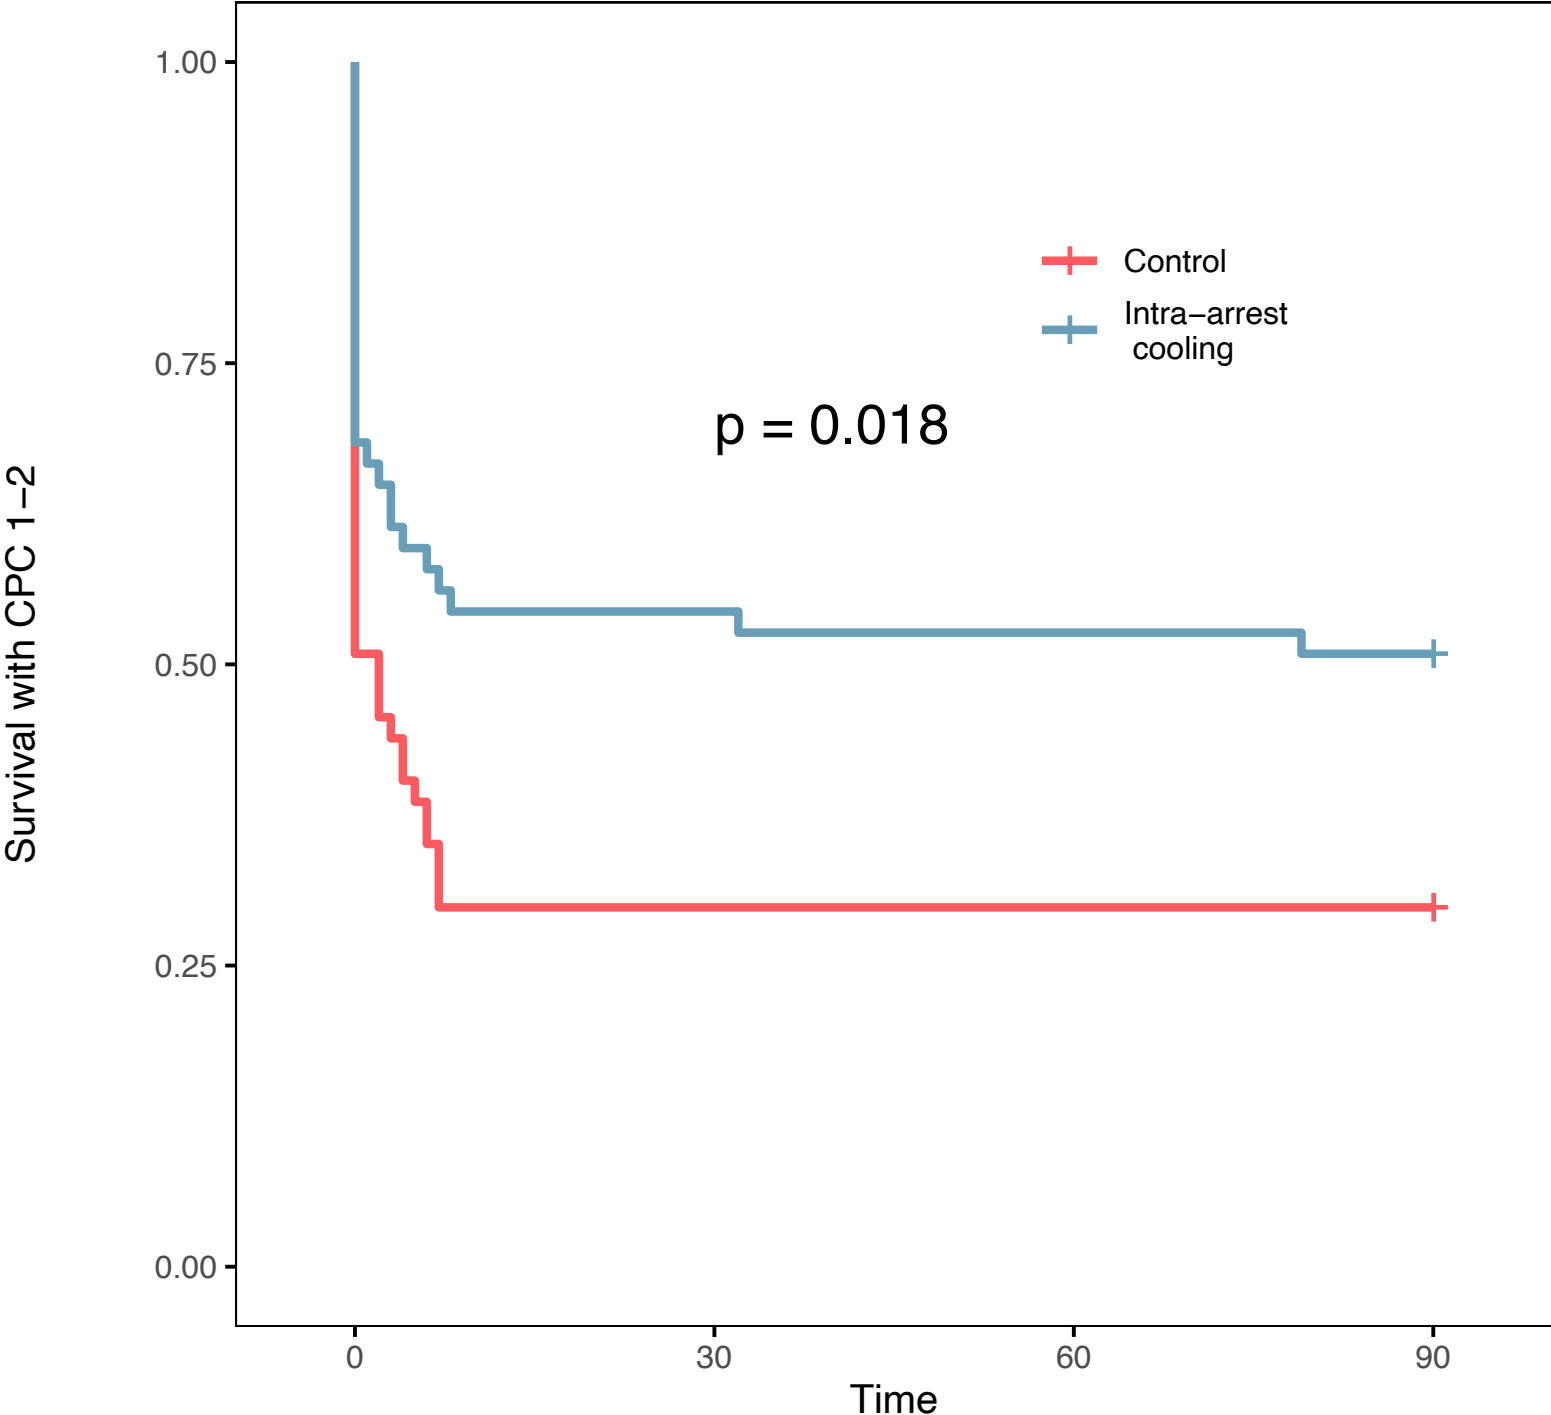

|                      |    |    |    |    |
|----------------------|----|----|----|----|
| Control              | 57 | 17 | 17 | 17 |
| Intra-arrest cooling | 57 | 31 | 30 | 29 |

Time
